# Supplementary material for: TiO2 cement for high-performance dye-sensitized solar cells
Source: Royal Society of Chemistry journal article supplement (doi:10.1039/c6ra20039g), 2016-01-01
Supplement: c6ra20039g1.pdf [file c6ra20039g1.pdf]

## Supporting Information

---

### **TiO<sub>2</sub> Cement for High-Performance Dye-Sensitized Solar Cells**

*Yu Hou,<sup>a,b†</sup> Shuang Yang,<sup>a†</sup> Chunzhong Li,<sup>a</sup> Huijun Zhao,<sup>b</sup> and Hua Gui Yang<sup>\*a</sup>*

*<sup>a</sup> Key Laboratory for Ultrafine Materials of Ministry of Education, School of Materials Science and Engineering, East China University of Science and Technology, 130 Meilong Road, Shanghai 200237, China*

*<sup>b</sup> Centre for Clean Environment and Energy, Gold Coast Campus, Griffith University, Queensland 4222, Australia*

*† These authors contributed equally to this work.*

*\*Corresponding author, E-mail: hgyang@ecust.edu.cn*

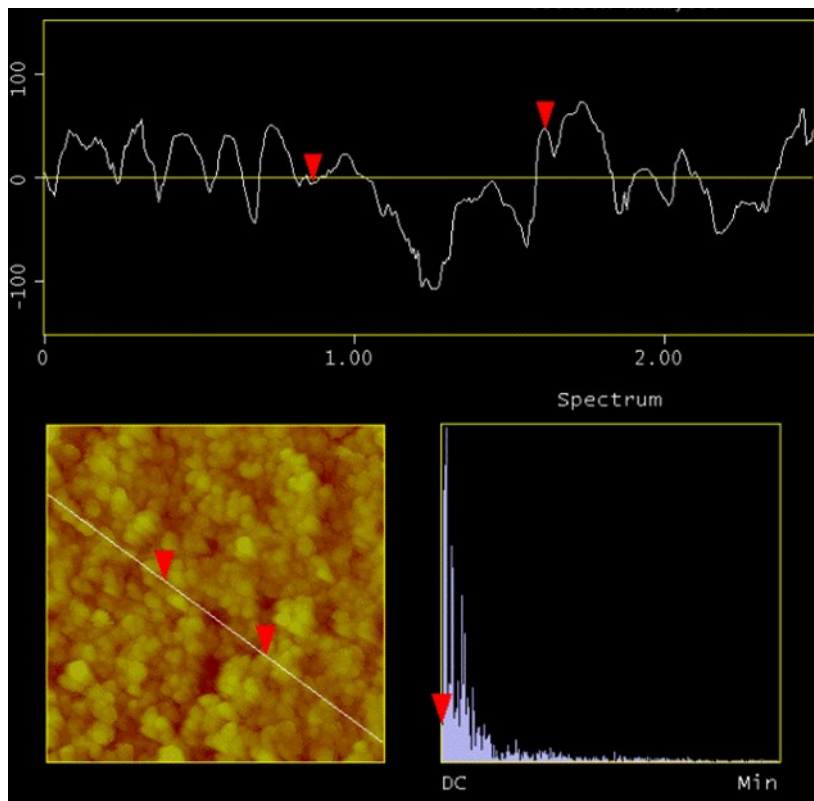

**Fig. S1** Typical atomic force microscope (AFM) topographic image ( $2\ \mu\text{m} \times 2\ \mu\text{m}$ ) of the as-prepared C3 film.

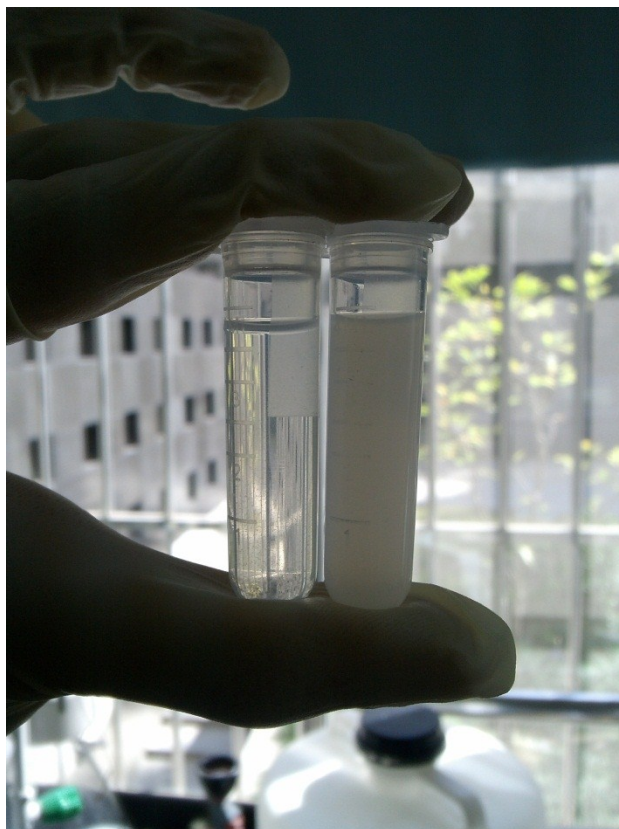

**Fig. S2** Digital camera image of the sample C2 (left) and P25 (right) after an ultrasonic treatment.

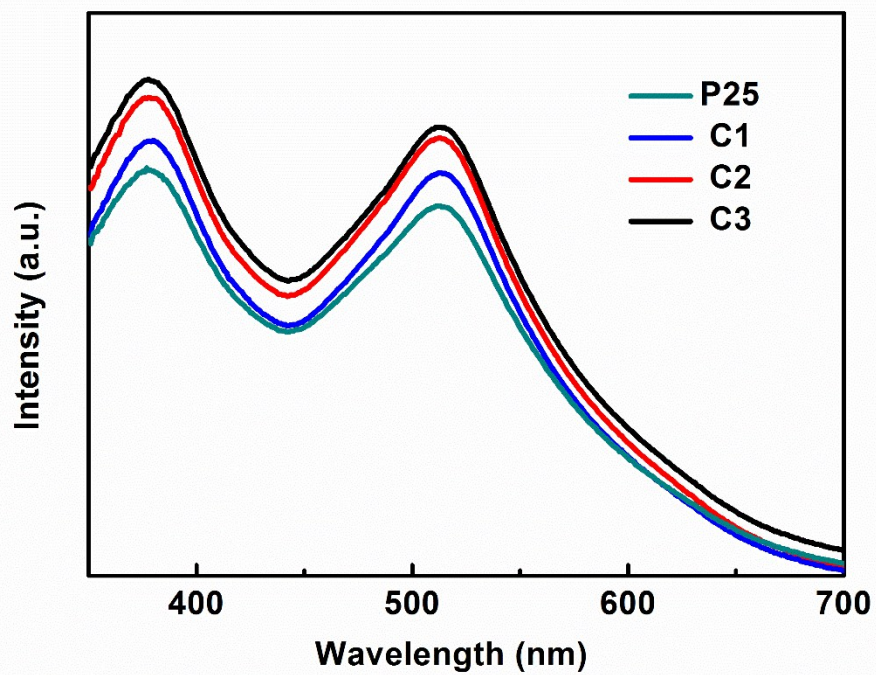

**Fig. S3** UV-vis absorption spectrum of N719 dye absorption on TiO<sub>2</sub> photoanode.
